# Supplementary material for: Planning an integrated disease surveillance and response system: a matrix of skills and activities
Source: BMC Med. 2007 Aug 15;5:24. doi: 10.1186/1741-7015-5-24 (PMC1988797; doi:10.1186/1741-7015-5-24)
Supplement: Additional file 1 — Detect and respond to priority diseases matrix [file 1741-7015-5-24-S1.pdf]

Figure 4: Detect and Respond to Priority Diseases Matrix

| DETECT AND RESPOND TO PRIORITY DISEASES                                                                                                                                                                                                                                                                                                                                                                                                                     |                                                                                                                                                                                                                                                                                                                                                                                                                                                                                                                                                                                                      |                                                                                                                                                                                                                                                                                                                                                                                                                                     |                                                                                                                                                                                                                                                                                                                                                                                                                                                                                                                                                                                                                                                                                                                                                                                                  |                                                                                                                                                                                                                                                                                                                                                                                                                                                                                                                                                                                                                                                    |                                                                                                                                                                                                                                                                                                                                                                                                                                                                                                                                  |                                                                                                                                                                                                                                                                                                                                                                                                                           |                                                                                                                                                                                                                                                                                                                                                                                                                                                                                                                                                                                                                                                                                                                                                                                                                                                                                                                                                    |
|-------------------------------------------------------------------------------------------------------------------------------------------------------------------------------------------------------------------------------------------------------------------------------------------------------------------------------------------------------------------------------------------------------------------------------------------------------------|------------------------------------------------------------------------------------------------------------------------------------------------------------------------------------------------------------------------------------------------------------------------------------------------------------------------------------------------------------------------------------------------------------------------------------------------------------------------------------------------------------------------------------------------------------------------------------------------------|-------------------------------------------------------------------------------------------------------------------------------------------------------------------------------------------------------------------------------------------------------------------------------------------------------------------------------------------------------------------------------------------------------------------------------------|--------------------------------------------------------------------------------------------------------------------------------------------------------------------------------------------------------------------------------------------------------------------------------------------------------------------------------------------------------------------------------------------------------------------------------------------------------------------------------------------------------------------------------------------------------------------------------------------------------------------------------------------------------------------------------------------------------------------------------------------------------------------------------------------------|----------------------------------------------------------------------------------------------------------------------------------------------------------------------------------------------------------------------------------------------------------------------------------------------------------------------------------------------------------------------------------------------------------------------------------------------------------------------------------------------------------------------------------------------------------------------------------------------------------------------------------------------------|----------------------------------------------------------------------------------------------------------------------------------------------------------------------------------------------------------------------------------------------------------------------------------------------------------------------------------------------------------------------------------------------------------------------------------------------------------------------------------------------------------------------------------|---------------------------------------------------------------------------------------------------------------------------------------------------------------------------------------------------------------------------------------------------------------------------------------------------------------------------------------------------------------------------------------------------------------------------|----------------------------------------------------------------------------------------------------------------------------------------------------------------------------------------------------------------------------------------------------------------------------------------------------------------------------------------------------------------------------------------------------------------------------------------------------------------------------------------------------------------------------------------------------------------------------------------------------------------------------------------------------------------------------------------------------------------------------------------------------------------------------------------------------------------------------------------------------------------------------------------------------------------------------------------------------|
| World Health Organization, Regional Office for Africa, Centers for Disease Control and Prevention<br>Technical guidelines for integrated disease surveillance and response in the African region<br>Atlanta, Georgia: Public Health Service, Centers for Disease Control and Prevention/Epidemiology Program Office, Division of International Health; National Center for Infectious Diseases, Division of Bacterial and Mycotic Diseases. July 2001:10-11 |                                                                                                                                                                                                                                                                                                                                                                                                                                                                                                                                                                                                      |                                                                                                                                                                                                                                                                                                                                                                                                                                     |                                                                                                                                                                                                                                                                                                                                                                                                                                                                                                                                                                                                                                                                                                                                                                                                  |                                                                                                                                                                                                                                                                                                                                                                                                                                                                                                                                                                                                                                                    |                                                                                                                                                                                                                                                                                                                                                                                                                                                                                                                                  |                                                                                                                                                                                                                                                                                                                                                                                                                           |                                                                                                                                                                                                                                                                                                                                                                                                                                                                                                                                                                                                                                                                                                                                                                                                                                                                                                                                                    |
|                                                                                                                                                                                                                                                                                                                                                                                                                                                             | 1.0 Identify<br><i>Note: Laboratory steps apply to each level with access to laboratory services</i>                                                                                                                                                                                                                                                                                                                                                                                                                                                                                                 | 2.0 Report                                                                                                                                                                                                                                                                                                                                                                                                                          | 3.0 Analyze and Interpret                                                                                                                                                                                                                                                                                                                                                                                                                                                                                                                                                                                                                                                                                                                                                                        | 4.0 Investigate<br><i>Note: These steps assume appropriate laboratory capacity</i>                                                                                                                                                                                                                                                                                                                                                                                                                                                                                                                                                                 | 5.0 Respond                                                                                                                                                                                                                                                                                                                                                                                                                                                                                                                      | 6.0 Provide Feedback                                                                                                                                                                                                                                                                                                                                                                                                      | 7.0 Evaluate and Improve the System                                                                                                                                                                                                                                                                                                                                                                                                                                                                                                                                                                                                                                                                                                                                                                                                                                                                                                                |
| Community                                                                                                                                                                                                                                                                                                                                                                                                                                                   | <ul style="list-style-type: none"><li>• Use simple case definitions to identify priority diseases or conditions in the community</li></ul>                                                                                                                                                                                                                                                                                                                                                                                                                                                           | <ul style="list-style-type: none"><li>• Know which health events to report to the health facility and when to report them</li></ul>                                                                                                                                                                                                                                                                                                 | <ul style="list-style-type: none"><li>• Involve local leaders in observing and interpreting disease patterns and trends in the community</li></ul>                                                                                                                                                                                                                                                                                                                                                                                                                                                                                                                                                                                                                                               | <ul style="list-style-type: none"><li>• Support case investigation activities such as informing the community of the problem, case finding, collecting of specimens and other activities</li></ul>                                                                                                                                                                                                                                                                                                                                                                                                                                                 | <ul style="list-style-type: none"><li>• Assist health authorities in selecting response activities</li><li>• Participate in response activities</li><li>• Mobilize community resources appropriate for response activity</li><li>• Carry out community health education</li></ul>                                                                                                                                                                                                                                                | <ul style="list-style-type: none"><li>• Give feedback to community members about reported cases and prevention activities</li></ul>                                                                                                                                                                                                                                                                                       | <ul style="list-style-type: none"><li>• Decide if public health action took place as planned</li><li>• Evaluate the community response to the public health action</li></ul>                                                                                                                                                                                                                                                                                                                                                                                                                                                                                                                                                                                                                                                                                                                                                                       |
| Health Facility                                                                                                                                                                                                                                                                                                                                                                                                                                             | <ul style="list-style-type: none"><li>• Use standard case definitions to identify priority diseases or conditions that present in:<ul style="list-style-type: none"><li>-inpatient and outpatient services</li><li>-community reports</li><li>-private sector reports</li></ul></li><li>• Record information about suspected cases in clinic register and patient charts</li><li>• Use local laboratory capacity to diagnose suspected cases</li><li>• Use standard protocols to process laboratory specimens</li><li>• Collect and transport clinical specimens for laboratory evaluation</li></ul> | <ul style="list-style-type: none"><li>• Report case-based information for immediately notifiable diseases</li><li>• Report data gathered from inpatient and outpatient services and from community and private sector sources</li><li>• Report summary data to next level</li><li>• Report laboratory results from screening sentinel populations at target sites (for example, STI clinic, MCH service, blood bank)</li></ul>      | <ul style="list-style-type: none"><li>• Prepare and periodically update graphs, tables and charts to describe time, person, and place for reported diseases and conditions</li><li>• Identify and report immediately any disease or condition that:<ul style="list-style-type: none"><li>- exceeds an action threshold</li><li>- occurs in locations where it was previously absent</li><li>- occurs more often in a population group than previously</li><li>- presents unusual trends or patterns</li></ul></li><li>• Interpret results. Discuss possible public health action with district team</li><li>• Observe changes in trends during routine analysis of laboratory results</li></ul>                                                                                                  | <ul style="list-style-type: none"><li>• Take part in investigation of reported outbreaks</li><li>• Collect, package, store and transport specimens for laboratory testing</li><li>• Use investigation and laboratory results to confirm the outbreak</li><li>• Process and record laboratory results</li><li>• Provide the results to clinical staff and patients</li></ul>                                                                                                                                                                                                                                                                        | <ul style="list-style-type: none"><li>• Treat cases and contacts according to standard case management guidelines</li><li>• Use appropriate infection control measures</li><li>• Carry out public health response with the district level</li><li>• Mobilize community involvement in the response</li><li>• Advocate for resources</li></ul>                                                                                                                                                                                    | <ul style="list-style-type: none"><li>• Give feedback to community members about outcome of reported cases and prevention activities</li></ul>                                                                                                                                                                                                                                                                            | <ul style="list-style-type: none"><li>• Monitor timeliness and completeness for reporting routine and case-based information to the district level</li><li>• Evaluate routine detection and reporting of priority diseases and conditions</li><li>• Evaluate preparedness for and timeliness of response activities</li><li>• Evaluate appropriateness of case management</li><li>• Take action to improve reporting practices</li><li>• Take action to improve readiness for timely response to outbreaks</li><li>• Maintain contact with community to maintain preparedness and prevention activities</li><li>• Monitor the interval between receipt of specimens and sending of results</li><li>• Monitor quality of laboratory results</li></ul>                                                                                                                                                                                               |
| District, State, Province                                                                                                                                                                                                                                                                                                                                                                                                                                   | <ul style="list-style-type: none"><li>• Maintain activities for collecting routine surveillance data in a timely way</li><li>• Review records of suspected outbreaks</li><li>• Collect and transport clinical specimens for laboratory evaluation</li></ul>                                                                                                                                                                                                                                                                                                                                          | <ul style="list-style-type: none"><li>• Support health facilities in knowledge and use of standard case definitions for reporting priority diseases and conditions</li><li>• Make sure health facility staff know when and how to report priority diseases and conditions</li><li>• Promptly report immediately notifiable diseases to the next level</li><li>• Report laboratory results to national and local officials</li></ul> | <ul style="list-style-type: none"><li>• Define denominators and obtain data for ensuring accurate denominators</li><li>• Aggregate data from health facility reports</li><li>• Analyze case-based data by person, place and time</li><li>• Calculate rates and thresholds</li><li>• Compare current data with previous periods</li><li>• Prepare and periodically update graphs, tables and charts to describe time, person and place for reported diseases and conditions</li><li>• Make conclusions about trends, thresholds, and analysis results</li><li>• Describe risk factors for priority disease or conditions</li></ul>                                                                                                                                                                | <ul style="list-style-type: none"><li>• Arrange and lead investigation of reported cases or outbreaks</li><li>• Assist health facility in safe collection, packaging, storage and transport of laboratory specimens for confirmatory testing</li><li>• Receive and interpret laboratory results</li><li>• Decide if the reported outbreak is confirmed</li><li>• Report the confirmed outbreak to the next level</li><li>• Distribute specimen collection kits for special surveillance activities</li></ul>                                                                                                                                       | <ul style="list-style-type: none"><li>• Select and implement appropriate public health response (for example, depending on the disease, plan to strengthen case management, conduct immunization activity, improve control and prevention activities)</li><li>• Convene epidemic response committee and plan response</li><li>• Conduct training for emergency activities</li><li>• Plan timely community information and education activities</li><li>• Alert nearby areas and districts about the confirmed outbreak</li></ul> | <ul style="list-style-type: none"><li>• Alert nearby areas and districts about outbreaks</li><li>• Give health facilities regular, periodic feedback about routine control and prevention activities</li></ul>                                                                                                                                                                                                            | <ul style="list-style-type: none"><li>• Monitor and evaluate program targets and indicators for measuring quality of the surveillance system</li><li>• Monitor and evaluate timeliness and completeness of reporting from health facilities in the district</li><li>• Monitor and evaluate timeliness of response to outbreaks</li><li>• Monitor routine prevention activities and modify them as needed</li></ul>                                                                                                                                                                                                                                                                                                                                                                                                                                                                                                                                 |
| National                                                                                                                                                                                                                                                                                                                                                                                                                                                    | <ul style="list-style-type: none"><li>• Establish steps for surveillance of sentinel populations</li><li>• Conduct special surveys to gather information about reported cases, outbreaks or unusual events</li><li>• Define and update surveillance needs and implement training for and other support to each level</li><li>• Advocate for adequate resources to support the identification and reporting of cases</li><li>• Set policies and procedures with national reference laboratory</li><li>• Use national reference laboratory for maintaining quality control and standards</li></ul>     | <ul style="list-style-type: none"><li>• Set policies and procedures for reporting priority diseases and conditions at each level</li><li>• Include private sector laboratories in the reporting network</li><li>• Support reporting activities throughout the system</li></ul>                                                                                                                                                      | <ul style="list-style-type: none"><li>• Set policies and procedures for analyzing and interpreting data</li><li>• Aggregate data received from district reports</li><li>• Make sure each level uses appropriate denominators for analysis</li><li>• Interpret trends from national perspective</li><li>• Adapt or define action thresholds</li><li>• Provide training resources for analyzing and interpreting data</li><li>• Analyze data for time, person and place</li><li>• Analyze map and stratify by district and other factors</li><li>• Make conclusions based on analysis results</li><li>• Provide reports and share data with national authorities and WHO as required</li><li>• Define public health analysis skills appropriate to each level of personnel in the system</li></ul> | <ul style="list-style-type: none"><li>• Alert laboratory and support its confirmation activities: supplies, transport media, logistics, transport of specimens</li><li>• Support activities for investigating reported outbreaks: supplies, logistics, equipment, budget</li><li>• Collaborate with international authorities as needed during investigations</li><li>• Notify regional, international networks about confirmed outbreak</li><li>• Process specimens from investigation and send timely results as required to each level</li><li>• Request additional specimens as needed</li><li>• Take part in epidemic response team</li></ul> | <ul style="list-style-type: none"><li>• Set policies and procedures for responding to cases and outbreaks of priority diseases and conditions</li><li>• Support epidemic response and preparedness activities</li><li>• Report and disseminate results of outbreak response in bulletins, media, press releases and briefings</li></ul>                                                                                                                                                                                          | <ul style="list-style-type: none"><li>• Give feedback about response activities to each level</li><li>• Give districts regular, periodic feedback about routine control and prevention activities</li><li>• Develop and periodically distribute regional bulletin for epidemiology and public health</li></ul>                                                                                                            | <ul style="list-style-type: none"><li>• Establish and disseminate policies and procedures for monitoring surveillance and outbreak response activities</li><li>• Establish policies and practices for supervising surveillance and outbreak response activities</li><li>• Evaluate detection and reporting activities, and make improvements as needed:<ul style="list-style-type: none"><li>- Monitor and evaluate program targets and indicators for measuring quality of the surveillance system</li><li>- Monitor and evaluate timeliness and completeness of reporting from intermediate levels</li><li>- Monitor and evaluate timeliness of national support for outbreak response</li><li>- Monitor and evaluate effectiveness of district-level outbreak response activities</li></ul></li><li>• Monitor routine prevention activities and modify as needed</li><li>• Monitor quality assurance for laboratories at lower levels</li></ul> |
| National WHO Representative, WHO Regional Office                                                                                                                                                                                                                                                                                                                                                                                                            | <ul style="list-style-type: none"><li>• Support policy setting at national and regional level for detecting priority diseases</li><li>• Mobilize resources for training, logistics and supervision</li><li>• Develop and distribute standard guidelines for surveillance “best practices”</li><li>• Inform countries about problems that may cross borders or have impact on regional areas</li></ul>                                                                                                                                                                                                | <ul style="list-style-type: none"><li>• Receive reports of outbreaks and international notifiable diseases</li></ul>                                                                                                                                                                                                                                                                                                                | <ul style="list-style-type: none"><li>• Establish and disseminate standard guidelines for analysis of data for each priority disease</li></ul>                                                                                                                                                                                                                                                                                                                                                                                                                                                                                                                                                                                                                                                   | <ul style="list-style-type: none"><li>• Communicate recommendations for case investigation and laboratory confirmation</li><li>• Mobilize resources for improving laboratory capacity and skills</li><li>• Mobilize resources for investigation and confirmation as required, based on national level need and request</li><li>• Provide laboratory training and equipment</li><li>• Establish guidelines for preparedness and outbreak investigations</li><li>• Participate in investigations as requested</li></ul>                                                                                                                              | <ul style="list-style-type: none"><li>• Support response activities (technical experts, guidelines)</li><li>• Report to and inform international authorities about outbreak response</li><li>• Calculate response indicators and report status to next level</li><li>• Assist national level with epidemiological response and development of public health action</li></ul>                                                                                                                                                     | <ul style="list-style-type: none"><li>• Provide feedback for collaboration with national and regional levels</li><li>• Inform countries about problems that may cross borders or have impact on regional levels</li><li>• Report analysis results in regional and international bulletins for disease trends and patterns</li><li>• Develop and distribute regional bulletin for epidemiology and public health</li></ul> | <ul style="list-style-type: none"><li>• Use reports from countries to measure their systems and advocate for improvements</li></ul>                                                                                                                                                                                                                                                                                                                                                                                                                                                                                                                                                                                                                                                                                                                                                                                                                |
